# Supplementary material
Source: publisher figshare collection journal article supplement (https://frontiersin.figshare.com/ndownloader/files/21709626)
Supplement: Supplementary file 1 [file 21709626]

## Sheet: species_table_final
	Supplementary Table S1: Deep-water coral morphospecies observed in the Phoenix Islands Protected Area during EX1703 and FK171005. Each taxon is present with higher classifications according to the World Register of Marine Species (Available from http://www.marinespecies.org). Each species is presented with the total number of records of that taxon, n, as well as the maximum and minimum depth of o…
	Group	Family	Morphospecies	Indentification from specimen collection	n	Minimum Depth (m)	Maximum Depth (m)
	Octocorallia - Alcyonacea	Primnoidae	Narella aurantiaca	✔️	738	558.204	1415.78
			Candidella sp. 5		672	605.326	1149.78
			Primnoidae spp.		618	520.751	2025.77
			Primnoidae sp. 19		375	721.222	1201.12
			Narella compressa	✔️	368	373.957	583.61
			Paracalyptrophora hawaiiensis	✔️	332	445.456	666.027
			Narella horrida	✔️	215	311.012	398.394
			Calyptrophora spp.		177	360.09	2040.74
			Calyptrophora antilla	✔️	166	699.611	1182
			Calyptrophora bayeri	✔️	64	458.847	1021.43
			Narella spp.		54	360.09	1949.58
			Calyptrophora clarki	✔️	48	418.516	1211.05
			Calyptrophora cf. inornata	✔️	44	373.084	418.019
			Calyptrophora sp. 7		42	709.098	1078.91
			Narella fordi	✔️	38	1817.57	1932.21
			Narella hypsocalyx	✔️	34	1398.69	1549.46
			Thouarella tydemani	✔️	33	679.558	819.736
			Callogorgia cracentis	✔️	31	1141.87	1785.51
			Primnoidae sp. 20		16	1189.71	1287.65
			Calyptrophora wyvillei	✔️	11	1041.97	1232.7
			Primnoidae sp. 18		11	201.048	207.205
			Thouaurella hilgendorfi	✔️	8	739.148	1358.33
			Calyptrophora cf. angularis	✔️	7	1738.85	1962.84
			Candidella gigantea		5	1861.66	2038.49
			Calyptrophora diaphana	✔️	4	1184.47	1593.05
			Candidella spp.		4	1875.47	1902.91
			Primnoidae sp. 21		3	522.019	672.881
			Primnoidae sp. 1		2	1860.55	2162.17
			Callogorgia sp. 2		1	373.638	373.638
			Candidella sp. 1		1	2170.85	2170.85
			Primnoidae sp. 2		1	2106.33	2106.33
		Chrysogorgiidae	Pleurogorgia sp. 1	✔️	1046	1741.3	2276.49
			Chrysogorgia sp. 1		384	758.39	2323.55
			Metallogorgia sp. 4	✔️	151	592.269	1410.58
			Chrysogorgia sp. 226		136	1071.1	1447.25
			Chrysogorgia sp. 0081	✔️	132	698.413	1442.25
			Iridogorgia magnispiralis	✔️	117	876.558	2219.77
			Metallogorgia sp. 5		116	628.281	962.598
			Chrysogorgia spp.		91	479.909	2093.21
			Metallogorgia melanotrichos	✔️	92	878.899	1955.34
			Chrysogorgia sp. 212	✔️	60	527.524	1144.65
			Chrysogorgia sp. 8		35	547.17	1009.48
			Chrysogorgia abludo	✔️	25	1314.52	2263.84
			Chrysogorgia sp. 10		19	931.929	1447.23
			Rhodaniridogorgia superba	✔️	14	595.39	1295.21
			Chrysogorgiidae sp. 1		12	2167.37	2198.38
			Chrysogorgia sp. 9		8	569.017	639.255
			Chrysogorgiidae spp.		7	792.508	2130.62
			Chrysogorgiidae sp. 0019	✔️	5	1168.93	1393.94
			Radicipes spiralis		2	1395.06	1410.52
			Chrysogorgia sp. 11		1	2048.53	2048.53
			Chrysogorgiidae sp. 229	✔️	1	1367.94	1367.94
			Iridogorgia cf. bella		1	1704.23	1704.23
		Plexauridae	Plexauridae spp.		637	384.415	1869.94
			Plexauridae sp. 2		489	545.09	1740.45
			Plexauridae sp. 6		205	355.431	1109.95
			Paramuricea sp. 0018	✔️	157	539.153	1428.29
			Plexauridae sp. 158	✔️	76	878.899	1208.89
			Plexauridae sp. 0046	✔️	55	1074.99	1602.69
			Paracis sp. 2		34	213.679	273.566
			Plexauridae sp. 197	✔️	27	433.731	548.04
			Swiftia sp. 263	✔️	26	492.533	928.397
			Plexauridae sp. 117	✔️	25	1124.47	1301.81
			Plexauridae sp. 8		14	834.411	1319.63
			Paracis cf. squamata	✔️	11	571.308	896.67
			Swiftia sp. 14	✔️	10	1628.99	1913.09
			Plexauridae sp. 3		9	1177.1	1584.79
			Paramuricea sp. 1		7	1105.46	1292.04
			Plexauridae sp. 284	✔️	5	896.553	1350.93
			Paracis sp. 1		3	575.355	601.824
			Plexauridae sp. 379	✔️	3	359.846	529.682
			Swiftia sp. 3		2	1104.06	1104.06
		Isididae	Isididae sp. 9		271	1079	1336.61
			Isididae sp. 2		91	1373.56	2067.61
			Keratoisidinae sp. 1	✔️	40	815.994	2188.79
			Isididae sp. 372	✔️	39	804.742	1521.35
			Isididae sp. 1		29	1769.17	2438.54
			Isididae spp.		27	821.794	2061.37
			Isididae sp. 3		22	1196.49	1955.34
			Isididae sp. 12		20	447.706	622.142
			Isididae sp. 6		20	502.774	1197.57
			Isidella sp. 1		12	1513.01	2176.38
			Isididae sp. 11		10	442.905	586.085
			Isididae sp. 13		8	595.116	595.346
			Isididae sp. 16		6	1794.91	2054.53
			Isididae sp. 8		4	1309.33	1711.59
			Isididae sp. 15		3	735.495	1934.31
			Isidella sp. 3		1	919.058	919.058
			Isididae sp 9		1	1722.3	1722.3
			Isididae sp. 302	✔️	1	922.978	922.978
		Coralliidae	Pleurocorallium porcellanum	✔️	179	902.259	1379.53
			Hemicorallium sp. 3		79	608.237	1625.98
			Hemicorallium sp. 4		53	596.976	1426.67
			Hemicorallium sp. 1		39	1866.71	2216.75
			Coralliidae sp. 1		36	782.753	1458.1
			Hemicorallium sp. 80	✔️	36	505.482	1195.08
			Hemicorallium sp. 2		32	605.095	1986.71
			Coralliidae spp.		22	503.031	2003.65
			Hemicorallium sp. 140	✔️	21	1857.37	2168.43
			Hemicorallium spp.		20	498.252	1249.44
			Coralliidae sp. 2		3	1405.82	1410.5
			Hemicorallium sp. 215	✔️	3	520.249	568.297
			Corallium sp. 1		1	1744.29	1744.29
			Hemicorallium sp. 427	✔️	1	481.022	481.022
		Victorgorgiidae	Victorgorgia sp. 4		62	844.514	1298.6
			Victorgorgia alba	✔️	45	532.071	1979.59
			Victorgorgia sp. 3		40	1074.99	1100.98
			Victorgorgia sp. 1		34	1333.23	1970.73
			Victorgorgia sp. 0041	✔️	15	1041.8	1456.72
			Victorgorgia sp. 208	✔️	3	569.415	634.183
			Victorgorgia sp. 290	✔️	3	840.22	1349.67
		Alcyoniidae	Anthomastus spp.		92	577.857	2230.92
			Alcyoniidae sp. 365	✔️	29	955.668	999.604
			Anthomastus tahinodus		12	1341.66	2164.5
		Clavulariidae	Trachythela sp. 1		10	564.116	1266.95
			Clavulariidae sp. 435	✔️	2	595.608	598.025
			Clavulariidae sp. 1		1	1819.66	1819.66
		Paragorgiidae	Paragorgia sp. 1	✔️	31	1350.96	2273.1
			Paragorgiidae spp.		3	497.683	535.601
		Acanthogorgiidae	Acanthogorgia sp. 2		11	884.132	1171.77
			Acanthogorgia sp. 378	✔️	3	536.448	571.308
			Acanthogorgia sp. 1		1	1773.16	1773.16
		Ellisellidae	Ellisellidae sp. 1		8	192.931	221.435
		Anthothelidae	Anthothelidae sp. 1		1	1869.94	1869.94
		Nephtheidae	Nephtheidae sp. 1		1	521.693	521.693
	Octocorallia - Pennatulacea	Halipteridae	Halipteris sp. 1		67	1191	1732.9
		Umbellulidae	Umbellula sp. 1		36	1225.6	1955.34
		Pennatulidae	Pennatula sp. 1		6	1225.6	1533.47
			Pennatula sp. 2		1	1443.93	1443.93
		Protoptilidae	Protoptilum sp. 1		4	1226.2	1641.45
			Protoptilidae sp. 1		2	1434.52	2116.66
		Anthoptilidae	Anthoptilum sp. 1	✔️	5	1291.28	1814.6
		Virgulariidae	Virgulariidae sp. 1		2	1740.47	1915.81
		incertae familiae	Pennatulacea sp. 1		1	2291.34	2291.34
			Pennatulacea sp. 2		21	1128.7	2287.05
	Antipatharia	Antipathidae	Stichopathes sp. 1		981	585.251	2086.27
			Stichopathes sp. 2	✔️	12	1590.12	1955.34
			Stichopathes sp. 3		10	240.696	271.232
		Schizopathidae	Umbellapathes sp. 2	✔️	413	414	799.007
			Bathypathes sp. 6		33	810.664	1874.99
			Umbellapathes sp. 1	✔️	20	1925.56	2236.89
			Bathypathes sp. 3		19	487.106	774.349
			Bathypathes sp. 1	✔️	13	1565.75	2260.5
			Umbellapathes sp. 3		11	1255.65	1814.7
			Bathypathes sp. 240	✔️	7	756.134	1272.67
			Bathypathes cf. patula		6	881.791	1744.58
			Stauropathes sp. 0017	✔️	4	1340.55	1853
			Alternatipathes sp. 1		3	891.021	1854.14
			Bathypathes sp. 2		3	1454.06	1639.8
			Bathypathes spp.		3	794.865	1296.26
			Parantipathes sp. 1	✔️	3	2053.63	2229.07
		Cladopathidae	Heteropathes americana	✔️	9	1847.06	2349.36
			Cladopathidae spp.		5	1983.24	2092.38
			Heteropathes spp.		2	561.113	573.56
		incertae familiae	Antipatharia sp. 4		41	1603.3	2327.15
			Antipatharia sp. 1		34	814.232	2215.02
			Antipatharia sp. 12		2	440.384	640.184
			Antipatharia sp. 2		2	1538.31	1710.86
			Antipatharia sp. 10		1	443.831	443.831
			Antipatharia sp. 11		1	468.762	468.762
			Antipatharia sp. 13		1	1923.13	1923.13
			Antipatharia sp. 138	✔️	1	2133.4	2133.4
			Antipatharia sp. 3		1	1661.68	1661.68
			Antipatharia sp. 6		1	1986.82	1986.82
			Antipatharia sp. 7		1	1937.42	1937.42
			Antipatharia sp. 8		1	1495.83	1495.83
			Antipatharia sp. 9		1	783.91	783.91
	Scleractinia	Dendrophylliidae	Enallopsammia rostrata	✔️	462	359.815	1521.86
			Enallopsammia pusilla	✔️	83	425.164	692.451
			Dendrophyllia ?arburcula	✔️	51	373.084	517.941
			Eguchipsammia sp. 1		50	192.931	398.365
		Caryophylliidae	Crispatotrochus rubescens	✔️	277	519.009	635.985
			Caryophyllia sp. 232	✔️	32	933.174	1373.55
			Caryophylliidae sp. 298	✔️	7	896.286	1213.64
			Vaughanella multipalifera	✔️	4	2202.68	2280.19
		Oculinidae	Madrepora oculata	✔️	45	644.312	1577.58
		Flabellidae	Javania cailleti	✔️	7	1488.06	1599.05
			Javania lamprotichum	✔️	7	422.501	1208.12
		incertae familiae	Scleractinia sp. 10		1	353.336	353.336
			Cup coral spp.		69	195	2102
	Zoantharia	Parazoanthidae	Zoantharia sp. 1		17	1114.12	1281.68
			Kulamanamana cf. haumeaae	✔️	15	447.706	514.769
		incertae familiae	Zoantharia sp. 285	✔️	1	1351.96	1351.96
			Total	75	12828	192.931	2438.54
						Minimum Depth (m)	Maximum Depth (m)
